# Supplementary material for: Fine mapping of the gene for susceptibility to black spot disease in Japanese pear (Pyrus pyrifolia Nakai)
Source: PubMed Central journal article supplement — Breed Sci. 2016 Mar 1;66(2):271–80. doi: 10.1270/jsbbs.66.271 (PMC4785004; doi:10.1270/jsbbs.66.271), 2016-03-01
Supplement: 66_271_1.pdf [file 66_271_1.pdf]

## Kin.LG11

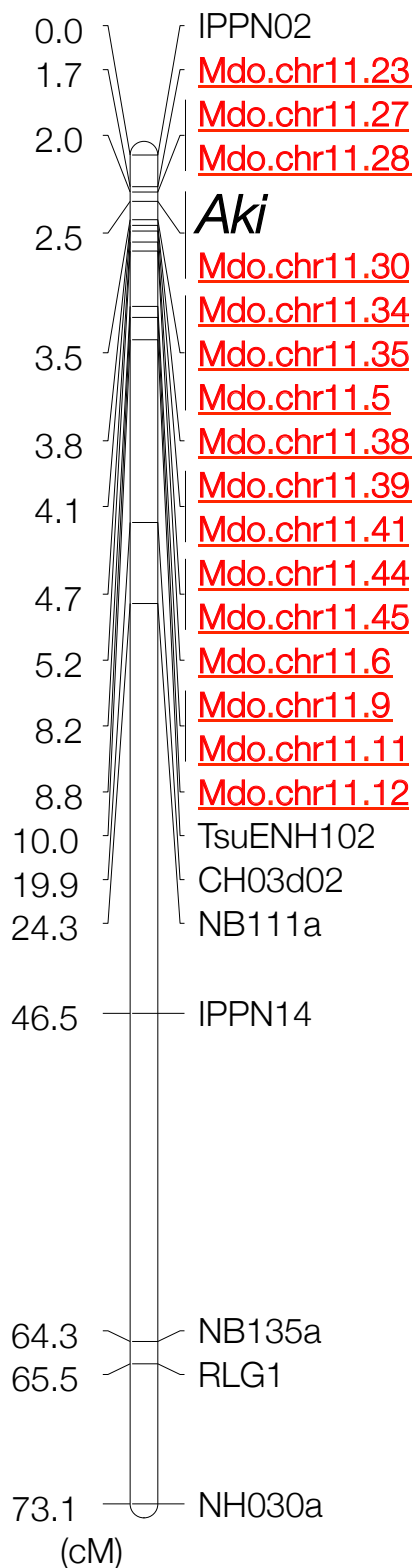

**Supplemental Fig. 1.** Linkage group 11 of the Japanese pear ‘Kinchaku’ (Kin.LG11). *Aki*, the black spot susceptibility gene. The numerical value described to left of each marker indicates genetic distance (cM).
